# Supplementary material
Source: PubMed Central journal article supplement (PMC8357273)
Supplement: aem.00349-21-s0001.pdf [file aem.00349-21-s0001.pdf]

## Supplemental Material

**Table S1** Rhizosphere soil physicochemical properties and root nutritional status in different fertilizer treatments.

| Variables                                                 | Control        | NPK            | NPKS           | NPKM           |
|-----------------------------------------------------------|----------------|----------------|----------------|----------------|
| RS_Moisture                                               | 13.2 (1.6)b    | 10.2 (1.2)b    | 15.0 (1.1)ab   | 20.9 (2.1)a    |
| RS_pH                                                     | 7.15 (0.03)a   | 5.41 (0.07)b   | 5.52 (0.16)b   | 7.06 (0.07)a   |
| RS_DOC (mg kg <sup>-1</sup> )                             | 47.3 (3.3)c    | 86.6 (7.5)b    | 114 (5)a       | 134 (8)a       |
| RS_DON (mg kg <sup>-1</sup> )                             | 0.820 (0.243)c | 5.63 (0.96)b   | 10.7 (1.5)a    | 6.86 (1.23)ab  |
| RS_NO <sub>3</sub> <sup>-</sup> -N (mg kg <sup>-1</sup> ) | 8.96 (0.87)b   | 18.8 (3.3)ab   | 8.18 (1.53)b   | 35.4 (11.8)a   |
| RS_NH <sub>4</sub> <sup>+</sup> -N (mg kg <sup>-1</sup> ) | 4.79 (0.13)a   | 6.01 (0.45)a   | 5.88 (1.58)a   | 5.58 (0.29)a   |
| RS_TC (g kg <sup>-1</sup> )                               | 8.91 (0.14)b   | 11.5 (0.4)b    | 15.7 (0.6)b    | 32.5 (3.6)a    |
| RS_TN (g kg <sup>-1</sup> )                               | 0.848 (0.026)c | 1.31 (0.06)b   | 1.59 (0.04)b   | 2.82 (0.12)a   |
| RS_TP (g kg <sup>-1</sup> )                               | 0.268 (0.009)c | 0.510 (0.036)b | 0.473 (0.020)b | 0.915 (0.034)a |
| RS_TK (g kg <sup>-1</sup> )                               | 13.9 (0.1)ab   | 12.6 (0.7)b    | 14.3 (0.2)ab   | 15.2 (0.6)a    |
| RS_AP (mg kg <sup>-1</sup> )                              | 2.37 (0.17)c   | 33.2 (3.2)b    | 27.4 (2.3)b    | 78.9 (3.9)a    |
| RS_AK (mg kg <sup>-1</sup> )                              | 129 (3)c       | 184 (32)bc     | 347 (27)b      | 825 (84)a      |
| RS_C:N ratio                                              | 10.5 (0.2)ab   | 8.78 (0.22)b   | 9.90 (0.27)ab  | 11.4 (0.8)a    |
| RS_C:P ratio                                              | 33.3 (0.5)a    | 22.9 (2.0)b    | 33.3 (0.4)a    | 35.2 (2.6)a    |
| RS_N:P ratio                                              | 0.106 (0.003)c | 0.163 (0.007)b | 0.199 (0.005)b | 0.353 (0.015)a |
| RS_Ca (g kg <sup>-1</sup> )                               | 6.47 (0.54)a   | 5.57 (0.75)a   | 4.78 (0.26)a   | 6.79 (0.08)a   |
| RS_Mg (g kg <sup>-1</sup> )                               | 5.85 (0.15)a   | 5.29 (0.04)b   | 5.25 (0.08)b   | 5.64 (0.08)ab  |
| RS_Na (g kg <sup>-1</sup> )                               | 10.7 (0.23)a   | 10.1 (0.1)ab   | 10.4 (0.1)a    | 9.67 (0.20)b   |
| RS_Fe (g kg <sup>-1</sup> )                               | 23.0 (0.7)a    | 23.0 (0.2)a    | 22.9 (0.4)a    | 21.6 (0.4)a    |
| RS_Mn (mg kg <sup>-1</sup> )                              | 372 (25)a      | 370 (28)a      | 394 (12)a      | 361 (16)a      |
| RS_Zn (mg kg <sup>-1</sup> )                              | 44.1 (1.4)b    | 42.3 (0.8)b    | 42.0 (0.5)b    | 54.4 (0.7)a    |
| Root_TC (g kg <sup>-1</sup> )                             | 402 (4)a       | 380 (3)b       | 382 (4)b       | 386 (5)ab      |
| Root_TN (g kg <sup>-1</sup> )                             | 6.63 (0.38)a   | 5.13 (0.95)a   | 4.66 (0.31)a   | 6.98 (0.88)a   |
| Root_TP (g kg <sup>-1</sup> )                             | 0.366 (0.027)c | 0.565 (0.019)b | 0.579 (0.021)b | 1.04 (0.04)a   |
| Root_TK (g kg <sup>-1</sup> )                             | 4.32 (0.52)b   | 4.45 (0.51)b   | 5.79 (0.36)ab  | 6.59 (0.14)a   |
| Root_C:N ratio                                            | 61.2 (2.9)a    | 80.9 (12.5)a   | 83.1 (5.9)a    | 57.7 (6.7)a    |
| Root_C:P ratio                                            | 1115 (82)a     | 674 (22)b      | 662 (23)b      | 372 (11)c      |
| Root_N:P ratio                                            | 18.2 (0.98)a   | 9.18 (1.91)b   | 8.03 (0.37)b   | 6.67 (0.67)b   |
| Root_Ca (g kg <sup>-1</sup> )                             | 2.05 (0.06)b   | 1.99 (0.10)b   | 1.74 (0.08)b   | 2.58 (0.17)a   |
| Root_Mg (g kg <sup>-1</sup> )                             | 0.848 (0.068)a | 1.02 (0.05)a   | 0.913 (0.045)a | 0.998 (0.085)a |
| Root_Na (g kg <sup>-1</sup> )                             | 0.951 (0.054)a | 0.886 (0.048)a | 0.783 (0.101)a | 1.00 (0.06)a   |
| Root_Fe (g kg <sup>-1</sup> )                             | 2.56 (0.33)a   | 3.79 (0.24)a   | 3.18 (0.11)a   | 2.85 (0.44)a   |
| Root_Mn (mg kg <sup>-1</sup> )                            | 67.5 (5.2)b    | 150 (17)a      | 146 (6)a       | 67.5 (6.0)b    |
| Root_Zn (mg kg <sup>-1</sup> )                            | 25.0 (2.0)a    | 16.3 (1.3)b    | 15.0 (0.9)b    | 14.8 (1.0)b    |

Values are mean (SE) (n = 4). Different letters in each column denote a significant difference among treatments detected by Tukey's HSD at  $P < 0.05$ . RS, Rhizosphere soil. DOC, dissolved organic carbon; DON, dissolved organic nitrogen;  $\text{NO}_3^-$ -N, nitrate nitrogen;  $\text{NH}_4^+$ -N, ammonium nitrogen; TC, total carbon; TN, total nitrogen; TP, total phosphorus; TK, total potassium; AP, available phosphorous; AK, available potassium. Control, no fertilizer addition; NPK, mineral fertilizer only; NPKS, mineral fertilizer plus wheat straw; NPKM, mineral fertilizer plus cow manure.

**Table S2** Results of an ADONIS test between different fertilization treatments on arbuscular mycorrhizal fungal (AMF) communities in the rhizosphere soil (RS) and root endosphere (ES), respectively. Differences between AMF communities were quantified by Bray-Curtis distances.

For abbreviations, see Table S1.

| ADONIS test      | RS             |          | ES             |          |
|------------------|----------------|----------|----------------|----------|
|                  | R <sup>2</sup> | <i>P</i> | R <sup>2</sup> | <i>P</i> |
| Total            | 0.30           | 0.001    | 0.29           | 0.003    |
| Control vs. NPK  | 0.73           | 0.043    | 0.95           | 0.028    |
| Control vs. NPKS | 0.59           | 0.022    | 0.97           | 0.026    |
| Control vs. NPKM | 0.70           | 0.033    | 0.99           | 0.028    |
| NPK vs. NPKS     | 0.25           | 0.038    | 0.54           | 0.043    |
| NPK vs. NPKM     | 0.68           | 0.026    | 0.95           | 0.025    |
| NPKS vs. NPKM    | 0.54           | 0.022    | 0.98           | 0.034    |

**Table S3** The relative abundance of arbuscular mycorrhizal fungal families in the rhizosphere soil (RS) and root endosphere (ES) under different fertilization treatments, respectively. For abbreviations, see Table S1.

| Relative abundance (%) | RS             |                 |                |                |
|------------------------|----------------|-----------------|----------------|----------------|
|                        | Control        | NPK             | NPKS           | NPKM           |
| Archaeosporaceae       | 0.028 (0.009)b | 0.430 (0.203)ab | 1.54 (0.67)a   | 0.029 (0.017)b |
| Claroideoglomeraceae   | 16.0 (3.8)c    | 77.2 (5.4)a     | 58.5 (10.2)ab  | 38.2 (5.5)b    |
| Diversisporaceae       | 4.14 (1.48)ab  | 0.894 (0.893)bc | 0c             | 5.12 (1.68)a   |
| Gigasporaceae          | 2.17 (2.15)b   | 0b              | 5.35 (5.34)ab  | 25.6 (10.6)a   |
| Glomeraceae            | 69.3 (2.7)a    | 20.3 (4.3)b     | 32.4 (13.1)b   | 21.4 (3.4)b    |
| Paraglomeraceae        | 8.36 (2.70)a   | 0.995 (0.526)b  | 2.09 (0.78)ab  | 6.52 (1.27)ab  |
| Other                  | 0a             | 0.261 (0.153)a  | 0.088 (0.065)a | 3.24 (2.29)a   |
| Relative abundance (%) | ES             |                 |                |                |
|                        | Control        | NPK             | NPKS           | NPKM           |
| Archaeosporaceae       | 26.6 (3.2)a    | 0b              | 0b             | 0b             |
| Claroideoglomeraceae   | 0a             | 0.286 (0.140)a  | 0.095 (0.089)a | 0.052 (0.036)a |
| Gigasporaceae          | 0a             | 0.008 (0.008)a  | 0a             | 0a             |
| Glomeraceae            | 72.2 (2.7)a    | 0.581 (0.314)b  | 0.097 (0.058)b | 0.113 (0.031)b |
| Paraglomeraceae        | 1.23 (1.14)b   | 80.5 (3.6)a     | 86.6 (1.7)a    | 99.6 (0.1)a    |
| Other                  | 0b             | 18.6 (3.8)a     | 13.2 (1.7)a    | 0.214 (0.072)b |

Values are mean (SE) (n = 4). Different letters in each column denote a significant difference among treatments detected by Tukey's HSD at  $P < 0.05$ .

**Table S4** Topological features of arbuscular mycorrhizal fungal co-occurrence networks of under different fertilization treatments in the rhizosphere soil (RS) and root endosphere (ES), respectively. For abbreviations, see Table S1.

| <b>Compartment</b> | <b>Topological features</b> | <b>Control</b> | <b>NPK</b> | <b>NPKS</b> | <b>NPKM</b> |
|--------------------|-----------------------------|----------------|------------|-------------|-------------|
| RS                 | Nodes                       | 114            | 66         | 66          | 56          |
|                    | Edges                       | 1468           | 335        | 344         | 326         |
|                    | Average degree              | 25.75          | 10.15      | 10.42       | 11.64       |
|                    | Transitivity                | 0.70           | 0.66       | 0.63        | 0.65        |
|                    | Modularity                  | 0.29           | 0.42       | 0.36        | 0.29        |
|                    | Positive correlations %     | 91.14          | 89.85      | 87.21       | 93.56       |
|                    | Negative correlations %     | 5.86           | 10.15      | 12.79       | 6.44        |
| ES                 | Nodes                       | 6              | 71         | 49          | 40          |
|                    | Edges                       | 12             | 300        | 120         | 73          |
|                    | Average degree              | 4.00           | 8.45       | 4.90        | 3.65        |
|                    | Transitivity                | 0.85           | 0.54       | 0.39        | 0.71        |
|                    | Modularity                  | 0              | 0.54       | 0.47        | 0.69        |
|                    | Positive correlations %     | 75.00          | 100        | 100         | 100         |
|                    | Negative correlations %     | 25.00          | 0          | 0           | 0           |

**Table S5** Spearman correlations (r) between the relative abundances of the two arbuscular mycorrhizal fungal (AMF) families and rhizosphere soil physicochemical properties and root nutritional status. Significant effects are shown in bold (\*  $P < 0.05$ ; \*\*  $P < 0.01$ ; \*\*\*  $P < 0.001$ ).

For abbreviations, see Table S1.

| Variables                          | Glomeraceae<br>in RS (r) | Paraglomeraceae<br>in RS (r) | Glomeraceae<br>in ES (r) | Paraglomeraceae<br>in ES (r) |
|------------------------------------|--------------------------|------------------------------|--------------------------|------------------------------|
| RS_Moisture                        | 0.13                     | 0.35                         | -0.42                    | <b>-0.55*</b>                |
| RS_pH                              | 0.38                     | <b>0.81***</b>               | 0.26                     | 0.01                         |
| RS_DOC                             | -0.47                    | -0.17                        | <b>-0.78***</b>          | <b>0.82***</b>               |
| RS_DON                             | -0.35                    | -0.42                        | <b>-0.79***</b>          | <b>0.58*</b>                 |
| RS_NO <sub>3</sub> <sup>-</sup> -N | <b>-0.62**</b>           | -0.12                        | 0.05                     | 0.54*                        |
| RS_NH <sub>4</sub> <sup>+</sup> -N | -0.47                    | -0.45                        | -0.39                    | 0.35                         |
| RS_TC                              | -0.44                    | -0.11                        | <b>-0.80***</b>          | <b>0.92***</b>               |
| RS_TN                              | -0.44                    | -0.21                        | <b>-0.79***</b>          | <b>0.89***</b>               |
| RS_TP                              | <b>-0.66**</b>           | 0.32                         | <b>-0.52*</b>            | <b>0.84***</b>               |
| RS_TK                              | 0.01                     | 0.32                         | -0.41                    | <b>0.64**</b>                |
| RS_AP                              | <b>-0.69**</b>           | -0.22                        | -0.45                    | <b>0.85***</b>               |
| RS_AK                              | -0.35                    | 0.01                         | <b>-0.73**</b>           | <b>0.88***</b>               |
| RS_C:N ratio                       | 0.49                     | <b>0.72**</b>                | 0.04                     | 0.05                         |
| RS_C:P ratio                       | 0.53                     | <b>0.52*</b>                 | -0.21                    | 0.09                         |
| RS_N:P ratio                       | -0.44                    | -0.12                        | <b>-0.79***</b>          | <b>0.89***</b>               |
| RS_Ca                              | 0.24                     | <b>0.57*</b>                 | 0.48                     | 0.04                         |
| RS_Mg                              | 0.42                     | <b>0.80***</b>               | 0.49                     | -0.08                        |
| RS_Na                              | <b>0.63**</b>            | 0.27                         | 0.22                     | <b>-0.56*</b>                |
| RS_Fe                              | 0.07                     | -0.28                        | 0.16                     | -0.29                        |
| RS_Mn                              | 0.21                     | 0.05                         | -0.07                    | -0.02                        |
| RS_Zn                              | -0.11                    | 0.39                         | 0.03                     | 0.37                         |
| Root_TC                            | <b>0.75**</b>            | <b>0.72**</b>                | <b>0.57*</b>             | <b>-0.55*</b>                |
| Root_TN                            | 0.19                     | <b>0.67**</b>                | 0.42                     | 0.03                         |
| Root_TP                            | -0.45                    | -0.14                        | <b>-0.59*</b>            | <b>0.84***</b>               |
| Root_TK                            | -0.13                    | 0.19                         | <b>-0.57*</b>            | <b>0.76**</b>                |
| Root_C:N ratio                     | -0.19                    | <b>-0.65**</b>               | -0.37                    | -0.02                        |
| Root_C:P ratio                     | <b>0.52*</b>             | 0.16                         | <b>0.58*</b>             | <b>-0.85***</b>              |
| Root_N:P ratio                     | <b>0.68**</b>            | 0.42                         | <b>0.55*</b>             | <b>-0.69**</b>               |
| Root_Ca                            | -0.22                    | 0.36                         | 0.27                     | 0.29                         |
| Root_Mg                            | <b>-0.65**</b>           | -0.43                        | -0.14                    | 0.35                         |
| Root_Na                            | -0.10                    | 0.36                         | 0.19                     | 0.26                         |

|         |               |                 |              |                |
|---------|---------------|-----------------|--------------|----------------|
| Root_Fe | <b>-0.59*</b> | <b>-0.72**</b>  | -0.19        | 0.10           |
| Root_Mn | -0.37         | <b>-0.80***</b> | -0.35        | -0.07          |
| Root_Zn | 0.39          | 0.33            | <b>0.60*</b> | <b>-0.67**</b> |

---

**Table S6** Spearman correlations (r) between arbuscular mycorrhizal fungal (AMF) operational taxonomic unit (OTU) richness and rhizosphere soil physicochemical properties and root nutritional status. Significant effects are shown in bold (\*  $P < 0.05$ ; \*\*  $P < 0.01$ ; \*\*\*  $P < 0.001$ ).

For abbreviations, see Table S1.

| Variables                          | Correlations (r) in RS | Correlations (r) in ES |
|------------------------------------|------------------------|------------------------|
| RS_Moisture                        | -0.17                  | -0.25                  |
| RS_pH                              | 0.17                   | <b>-0.59*</b>          |
| RS_DOC                             | <b>-0.78***</b>        | 0.32                   |
| RS_DON                             | <b>-0.54*</b>          | 0.36                   |
| RS_NO <sub>3</sub> <sup>-</sup> -N | -0.49                  | 0.45                   |
| RS_NH <sub>4</sub> <sup>+</sup> -N | -0.32                  | <b>0.68**</b>          |
| RS_TC                              | <b>-0.73**</b>         | 0.29                   |
| RS_TN                              | <b>-0.76**</b>         | 0.27                   |
| RS_TP                              | <b>-0.75**</b>         | 0.44                   |
| RS_TK                              | -0.23                  | -0.13                  |
| RS_AP                              | <b>-0.77***</b>        | <b>0.51*</b>           |
| RS_AK                              | <b>-0.70**</b>         | 0.16                   |
| RS_C:N ratio                       | 0.05                   | <b>-0.61*</b>          |
| RS_C:P ratio                       | -0.02                  | <b>-0.55**</b>         |
| RS_N:P ratio                       | <b>-0.76**</b>         | 0.27                   |
| RS_Ca                              | 0.23                   | -0.37                  |
| RS_Mg                              | 0.21                   | <b>-0.61*</b>          |
| RS_Na                              | <b>0.66**</b>          | <b>-0.51*</b>          |
| RS_Fe                              | 0.33                   | 0.18                   |
| RS_Mn                              | 0.35                   | -0.07                  |
| RS_Zn                              | -0.31                  | -0.22                  |
| Root_TC                            | <b>0.68**</b>          | <b>-0.63**</b>         |
| Root_TN                            | -0.05                  | -0.36                  |
| Root_TP                            | <b>-0.71**</b>         | 0.29                   |
| Root_TK                            | -0.47                  | 0.09                   |
| Root_C:N ratio                     | 0.09                   | 0.39                   |
| Root_C:P ratio                     | <b>0.77**</b>          | -0.29                  |
| Root_N:P ratio                     | <b>0.67**</b>          | <b>-0.50*</b>          |
| Root_Ca                            | -0.23                  | -0.30                  |
| Root_Mg                            | <b>-0.52*</b>          | 0.31                   |
| Root_Na                            | -0.37                  | -0.21                  |
| Root_Fe                            | -0.34                  | 0.47                   |



|         |       |                |
|---------|-------|----------------|
| Root_Mn | -0.13 | <b>0.53*</b>   |
| Root_Zn | 0.41  | <b>-0.63**</b> |

---

**Table S7** Applied amounts of nutrients in the four treatments in an ongoing long-term experiment (35 years). For abbreviations, see Table S1.

| Treatment | Mineral fertilizer<br>(kg/hm <sup>2</sup> y <sup>-1</sup> ) |    |    | Wheat straw (Fresh Base)<br>(7,500 kg/hm <sup>2</sup> y <sup>-1</sup> ) |          |          | Cow manure (Fresh Base)<br>(30,000 kg/hm <sup>2</sup> y <sup>-1</sup> ) |          |          |
|-----------|-------------------------------------------------------------|----|----|-------------------------------------------------------------------------|----------|----------|-------------------------------------------------------------------------|----------|----------|
|           | N                                                           | P  | K  | N                                                                       | P        | K        | N                                                                       | P        | K        |
| Control   | 0                                                           | 0  | 0  | 0                                                                       | 0        | 0        | 0                                                                       | 0        | 0        |
| NPK       | 180                                                         | 90 | 86 | 0                                                                       | 0        | 0        | 0                                                                       | 0        | 0        |
| NPKS      | 180                                                         | 90 | 86 | 5.5 g/kg                                                                | 3.2 g/kg | 9.7 g/kg | 0                                                                       | 0        | 0        |
| NPKM      | 180                                                         | 90 | 86 | 0                                                                       | 0        | 0        | 7.9 g/kg                                                                | 4.3 g/kg | 9.1 g/kg |

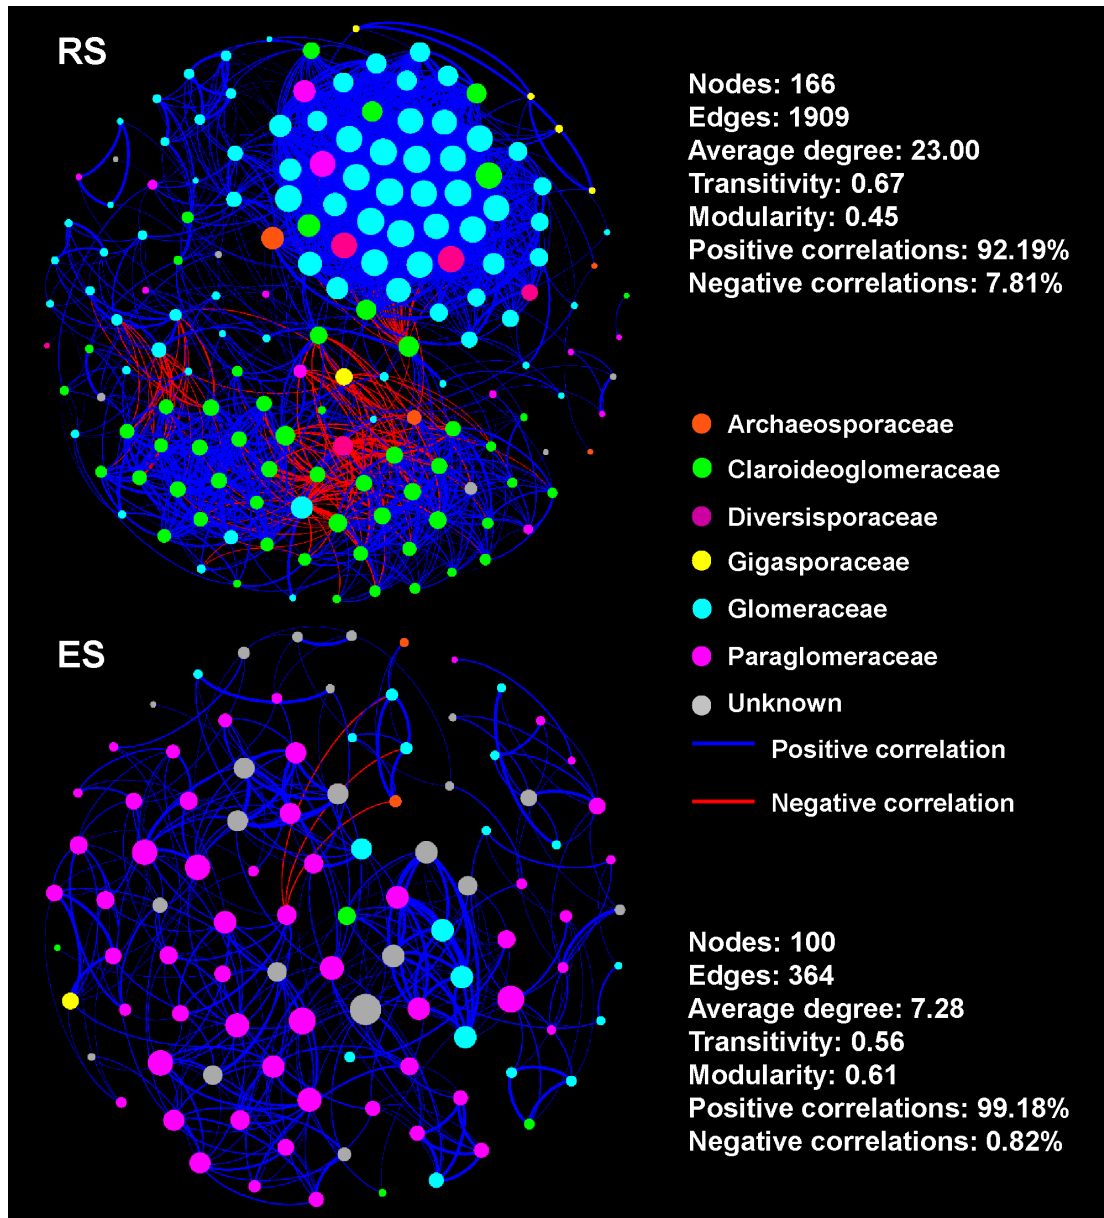

**Fig. S1** Co-occurrence networks for visualizing significant associations ( $r > 0.60$ ,  $P < 0.05$ ) between arbuscular mycorrhizal fungal (AMF) operational taxonomic units (OTUs) in the rhizosphere soil (RS) and root endosphere (ES). Each dot represents an AMF OTU, different colors represent different families, node size represents the degree of the node, and edges denote significant relationships between OTUs.

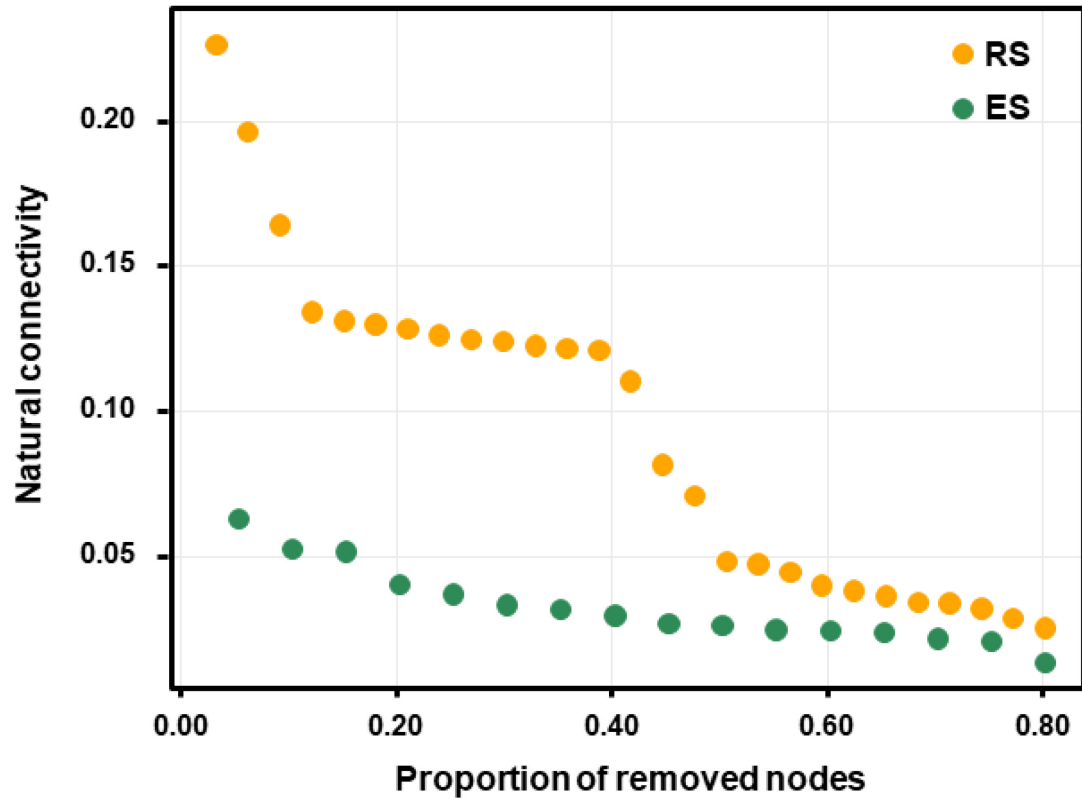

**Fig. S2** Network stability. The decrease of natural connectivity when attack nodes in the static network.
